# Supplementary material for: Efficacy of systemic temozolomide‐activated phage‐targeted gene therapy in human glioblastoma
Source: PubMed Central journal article supplement (PMC6460351; doi:10.15252/emmm.201708492), 2019-02-27
Supplement: EMMM-11-e8492-s002.pdf [file EMMM-11-e8492-s002.pdf]

**A**

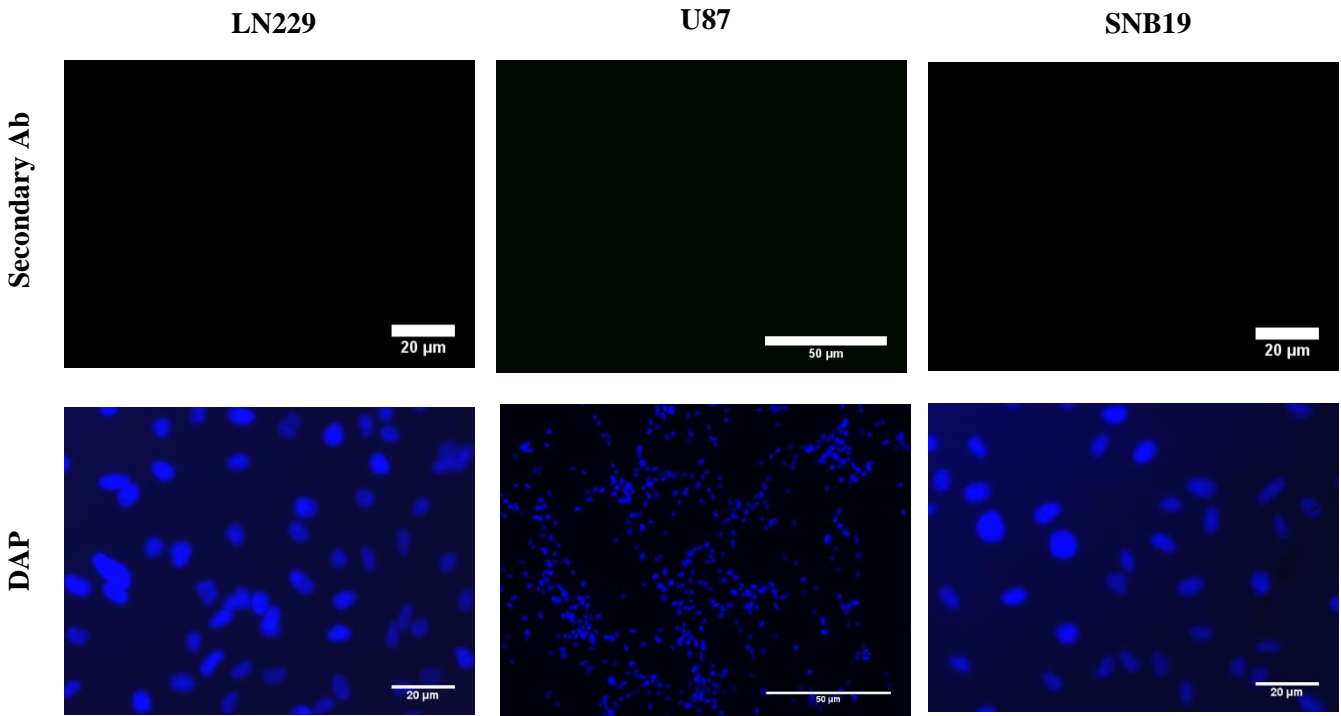

**B**

**LN229**

| Day | Non-targeted/AAVP-Luc |            |           | RGD4C/AAVP-Luc |             |             |
|-----|-----------------------|------------|-----------|----------------|-------------|-------------|
| 1   | 9,810553              | -12,582210 | 5,512580  | 158,418200     | 4,160052    | 5,641129    |
| 2   | -9,360215             | 4,114339   | 5,329962  | 519,960300     | 668,208200  | 694,974700  |
| 3   | 7,656897              | -7,219358  | 6,818131  | 545,872400     | 686,976100  | 483,592700  |
| 4   | 42,592070             | -12,788640 | 10,009630 | 1887,804000    | 710,291100  | 1731,185000 |
| 5   | 9,741107              | 3,820412   | 3,919520  | 1682,749000    | 2155,202000 | 1953,643000 |

**U87**

| Day | Non-targeted/AAVP-Luc |            |            | RGD4C/AAVP-Luc |             |             |
|-----|-----------------------|------------|------------|----------------|-------------|-------------|
| 1   | 0,8096071             | 3,694685   | 5,110786   | 80,298050      | 70,233020   | 80,597710   |
| 2   | 1,639114              | 3,706106   | 1,734782   | 392,806100     | 671,031400  | 460,704100  |
| 3   | 11,065350             | 12,529190  | 131,006200 | 672,644000     | 786,320800  | 713,909400  |
| 4   | 3,019078              | 90,721680  | 40,887590  | 1256,321000    | 1247,444000 | 1471,143000 |
| 5   | 52,691760             | 107,537900 | 99,987080  | 2048,252000    | 2040,297000 | 2298,867000 |

**SNB19**

| Day | Non-targeted/AAVP-Luc |           |            | RGD4C/AAVP-Luc |            |            |
|-----|-----------------------|-----------|------------|----------------|------------|------------|
| 1   | 5,610531              | -8,107594 | -13,856450 | 17,761300      | 11,863760  | 9,738642   |
| 2   | 12,249370             | 4,414483  | 3,977534   | 49,237390      | 76,048460  | 140,122200 |
| 3   | 4,688857              | 1,532550  | 1,274226   | 340,848600     | 355,245800 | 302,623900 |
| 4   | 110,614200            | 42,317300 | 4,547429   | 480,337000     | 435,102100 | 486,758400 |
| 5   | 2,647971              | 21,376580 | 19,482430  | 541,676000     | 554,037500 | 591,498400 |

C

LN229

Grp78

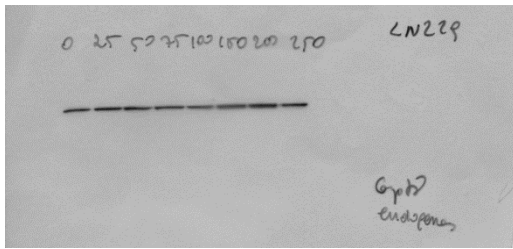

GAPDH

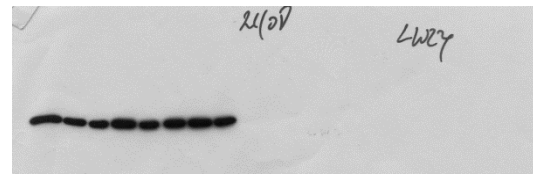

U87

Grp78

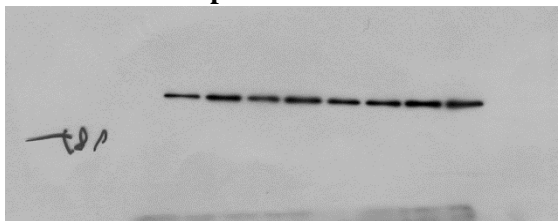

GAPDH

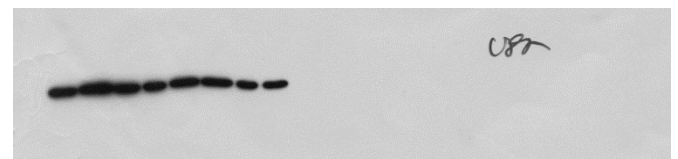

SNB19

Grp78

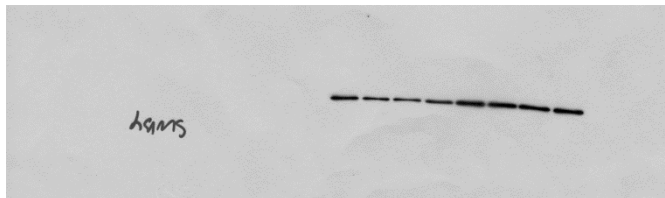

GAPDH

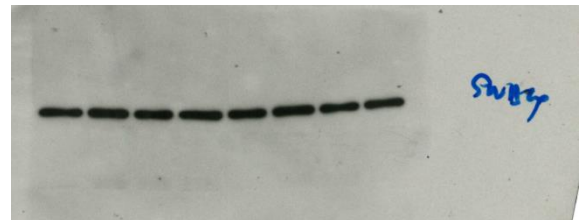

| TMZ $\mu$ M | LN229      |            | U87        |            | SNB19      |            |
|-------------|------------|------------|------------|------------|------------|------------|
| 25          | 97,193810  | 89,834420  | 58,900590  | 77,534500  | 69,893460  | 91,120830  |
| 50          | 92,721470  | 86,165250  | 69,076350  | 83,629270  | 72,013920  | 91,863350  |
| 75          | 110,172800 | 89,645970  | 70,786480  | 74,418030  | 102,623000 | 103,452800 |
| 100         | 111,825700 | 101,716900 | 80,177570  | 73,617430  | 118,849600 | 107,563200 |
| 150         | 98,602600  | 93,688150  | 108,312500 | 97,154330  | 122,837100 | 100,465600 |
| 200         | 106,364600 | 108,486700 | 165,770100 | 147,737000 | 119,019400 | 109,240800 |
| 250         | 132,246300 | 152,835300 | 191,336600 | 199,615000 | 123,828600 | 106,555800 |

D

LN229

| Hours | RGD4C/AAVP-CMV-Luc |              |              | RGD4C/AAVP-Grp78-Luc |               |               |
|-------|--------------------|--------------|--------------|----------------------|---------------|---------------|
| 1     | 2936,939000        | 8284,805000  | 2381,161000  | 33786,030000         | 205087,500000 | 28193,120000  |
| 2     | 1490,459000        | 5849,790000  | 2723,354000  | 22705,740000         | 34377,950000  | 67805,250000  |
| 3     | 2278,453000        | 2431,845000  | 1777,738000  | 22928,700000         | 72542,800000  | 26245,130000  |
| 6     | 37834,570000       | 12291,290000 | 63168,800000 | 58312,180000         | 20757,850000  | 37989,520000  |
| 9     | 13318,670000       | 78208,330000 | 14056,210000 | 635976,100000        | 388628,300000 | 390275,200000 |
| 12    | 3188,594000        | 1574,155000  | 2885,067000  | 388966,800000        | 663517,500000 | 624451,100000 |
| 24    | 20977,640000       | 44734,360000 | 23773,860000 | 422507,800000        | 619960,400000 | 654713,200000 |

U87

| Hours | RGD4C/AAVP-CMV-Luc |               |               | RGD4C/AAVP-Grp78-Luc |                |                |
|-------|--------------------|---------------|---------------|----------------------|----------------|----------------|
| 1     | 149905,700000      | 631020,800000 | 57083,840000  | 295628,100000        | 238193,900000  | 314469,400000  |
| 2     | 14217,590000       | 16296,200000  | 39313,920000  | 260991,500000        | 463989,400000  | 492370,300000  |
| 3     | 37607,300000       | 366026,200000 | 370194,800000 | 282495,000000        | 272071,300000  | 570599,000000  |
| 6     | 39922,640000       | 208657,100000 | 23686,010000  | 343280,300000        | 358137,800000  | 538212,000000  |
| 9     | 14281,490000       | 379279,500000 | 34095,520000  | 1861823,000000       | 1386869,000000 | 1807141,000000 |
| 12    | 106183,500000      | 10036,190000  | 68503,700000  | 1530734,000000       | 1526206,000000 | 2235250,000000 |
| 24    | 882060,000000      | 402890,900000 | 132820,200000 | 1857305,000000       | 2077726,000000 | 2204814,000000 |

SNB19

| Hours | RGD4C/AAVP-CMV-Luc |                |                | RGD4C/AAVP-Grp78-Luc |                |                |
|-------|--------------------|----------------|----------------|----------------------|----------------|----------------|
| 1     | 416647,700000      | 414459,600000  | 339484,300000  | 413950,600000        | 457036,000000  | 476159,100000  |
| 2     | 829918,600000      | 506631,900000  | 691322,600000  | 1202749,000000       | 473653,700000  | 1263968,000000 |
| 3     | 211075,900000      | 223775,000000  | 257470,700000  | 462554,000000        | 620181,700000  | 633846,100000  |
| 6     | 5331778,000000     | 371517,000000  | 375410,800000  | 2871222,000000       | 776778,200000  | 536561,600000  |
| 9     | 592124,400000      | 742289,100000  | 876517,100000  | 1016387,000000       | 1268375,000000 | 1623303,000000 |
| 12    | 680612,800000      | 692208,200000  | 739553,300000  | 1046521,000000       | 1047446,000000 | 1090348,000000 |
| 24    | 1873496,000000     | 1375675,000000 | 1595929,000000 | 5480756,000000       | 7543195,000000 | 7037867,000000 |

**Figure 1- Targeted transduction of human glioblastoma cell lines and induction of RGD4C/AAVP-Grp78 by TMZ.**
