# Supplementary material for: Efficacy of systemic temozolomide‐activated phage‐targeted gene therapy in human glioblastoma
Source: PubMed Central journal article supplement (PMC6460351; doi:10.15252/emmm.201708492), 2019-02-27
Supplement: EMMM-11-e8492-s003.pdf [file EMMM-11-e8492-s003.pdf]

A

LN229

eIF2

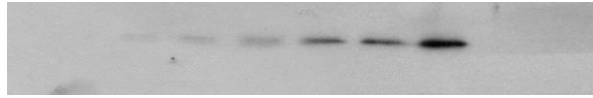

ATF6

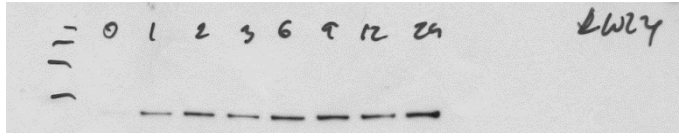

GAPDH

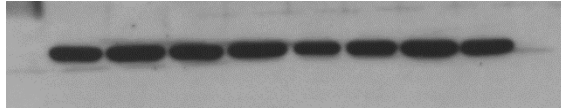

U87

eIF2

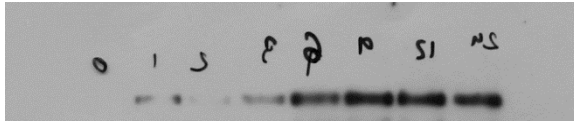

ATF6

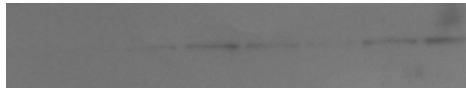

GAPDH

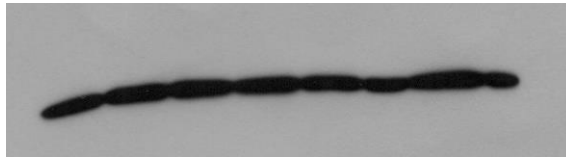

SNB19

eIF2

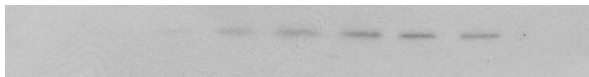

ATF6

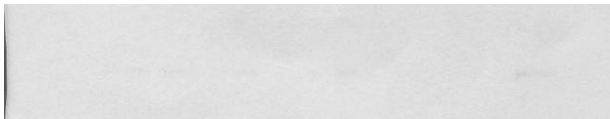

GAPDH

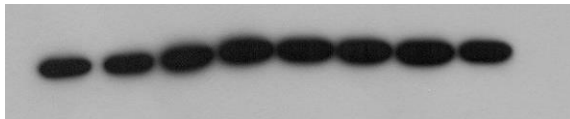

**B**

**LN229**

**XBP1**

**GAPDH**

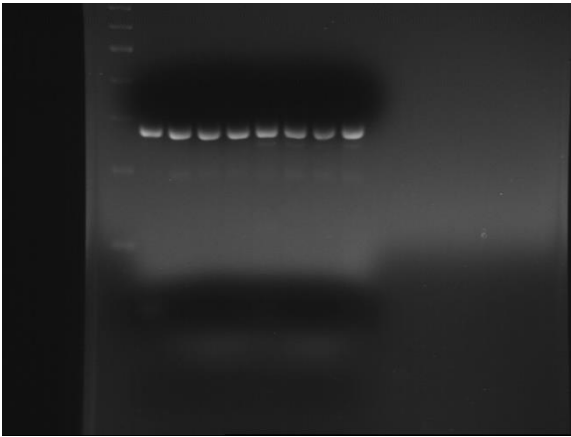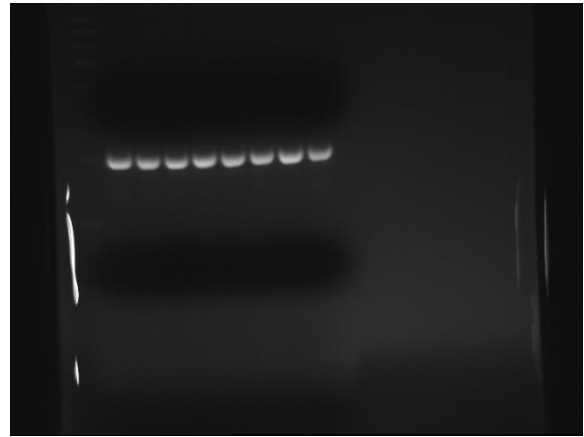

**U87**

**XBP1**

**GAPDH**

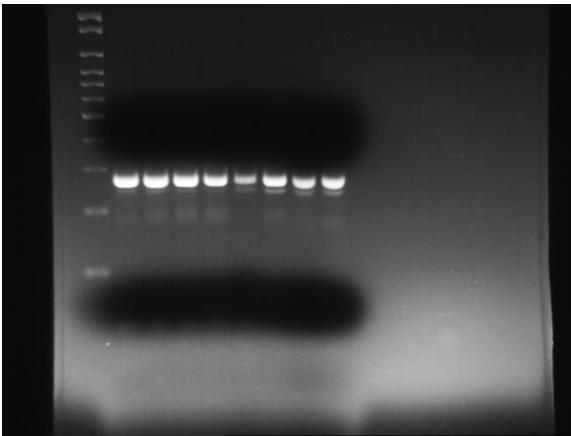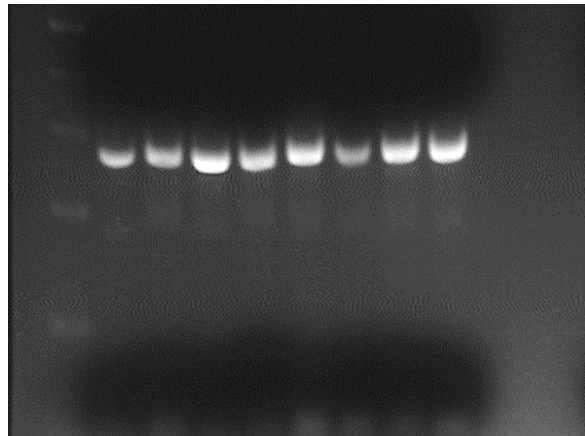

**SNB19**

**XBP1**

**GAPDH**

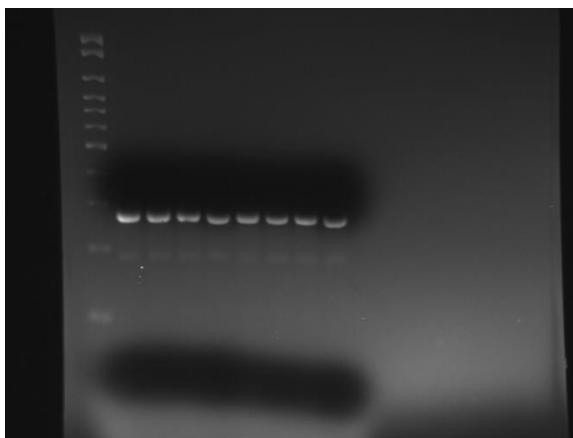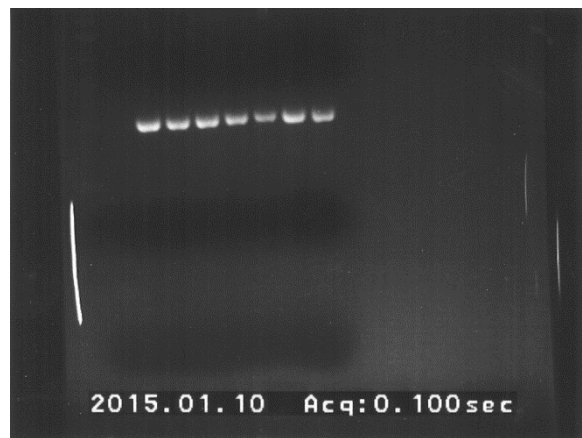

C

**LN229**

| Treatment | RGD4C/AAVP-CMV-HSVtk |       |       | RGD4C/AAVP-Grp78-HSVtk |       |       |
|-----------|----------------------|-------|-------|------------------------|-------|-------|
| control   | 2,65                 | 2,50  | 2,99  | 4,40                   | 3,51  | 3,98  |
| TMZ       | 12,80                | 10,20 | 14,70 | 28,50                  | 26,60 | 25,70 |
| GCV       | 75,60                | 74,80 | 71,33 | 82,40                  | 85,30 | 87,00 |
| TMZ + GCV | 78,80                | 82,60 | 81,90 | 88,20                  | 91,00 | 90,20 |

**U87**

| Treatment | RGD4C/AAVP-CMV-HSVtk |          |          | RGD4C/AAVP-Grp78-HSVtk |          |          |
|-----------|----------------------|----------|----------|------------------------|----------|----------|
| control   | 12,00000             | 13,10000 | 12,80000 | 6,95000                | 7,74000  | 7,34000  |
| TMZ       | 11,36667             | 10,26667 | 10,81667 | 10,95667               | 10,75667 | 10,85667 |
| GCV       | 59,86667             | 54,46667 | 57,16667 | 63,55667               | 61,55667 | 62,55667 |
| TMZ + GCV | 67,06667             | 62,26667 | 64,66667 | 77,45667               | 74,35667 | 75,90667 |

**SNB19**

| Treatment | RGD4C/AAVP-CMV-HSVtk |       |       | RGD4C/AAVP-Grp78-HSVtk |       |       |
|-----------|----------------------|-------|-------|------------------------|-------|-------|
| control   | 4,94                 | 5,26  | 5,17  | 9,45                   | 11,20 | 9,35  |
| TMZ       | 9,84                 | 9,31  | 9,63  | 23,90                  | 18,90 | 21,90 |
| GCV       | 48,90                | 37,90 | 44,40 | 71,20                  | 62,40 | 65,40 |
| TMZ + GCV | 59,60                | 64,10 | 59,30 | 82,20                  | 83,20 | 89,60 |

**Figure 2- TMZ activation of the UPR pathway and subsequent enhancement of glioblastoma cell killing *in vitro* by the RGD4C/AAVP-Grp78-HSVtk and GCV**
