# Supplementary material for: Efficacy of systemic temozolomide‐activated phage‐targeted gene therapy in human glioblastoma
Source: PubMed Central journal article supplement (PMC6460351; doi:10.15252/emmm.201708492), 2019-02-27
Supplement: EMMM-11-e8492-s004.pdf [file EMMM-11-e8492-s004.pdf]

**C**

|                     | <b>RGD4C/AAVP-CMV-HSVtk</b> |           |           |           | <b>Non-targeted</b> |          |          |          |
|---------------------|-----------------------------|-----------|-----------|-----------|---------------------|----------|----------|----------|
| <b>Brain Tumor</b>  | 12.093210                   | 10.110700 | 11.763180 | 12.331310 | 1.000000            | 1.000000 | 1.000000 | 1.000000 |
| <b>Brain tissue</b> | 1.526791                    | 1.753509  | 2.080406  | 2.133436  | 1.000000            | 1.000000 | 1.000000 | 1.000000 |
| <b>Pancreas</b>     | 0.6863734                   | 0.6558629 | 0.3406803 | 1.443835  | 1.000000            | 1.000000 | 1.000000 | 1.000000 |

**D**

|                    | <b>output</b> |         |         |         | <b>input</b> |             |             |             |
|--------------------|---------------|---------|---------|---------|--------------|-------------|-------------|-------------|
| <b>Brain Tumor</b> | 7360000       | 6160000 | 7160000 | 7500000 | 50000000000  | 50000000000 | 50000000000 | 50000000000 |

**Figure 3- Systemic targeting of orthotopic glioblastoma with RGD4C/AAVP-Grp78-HSVtk.**
