# Supplementary material for: Efficacy of systemic temozolomide‐activated phage‐targeted gene therapy in human glioblastoma
Source: PubMed Central journal article supplement (PMC6460351; doi:10.15252/emmm.201708492), 2019-02-27
Supplement: EMMM-11-e8492-s005.pdf [file EMMM-11-e8492-s005.pdf]

**B**

|                                        | Days post intracranial cell implantation |        |        |          |        |         |        |        |           |         |
|----------------------------------------|------------------------------------------|--------|--------|----------|--------|---------|--------|--------|-----------|---------|
|                                        | 9                                        |        |        |          |        | 27      |        |        |           |         |
|                                        |                                          |        |        |          |        |         |        |        |           |         |
| <b>non-targeted</b>                    | 1,3870                                   | 3,6140 | 1,6020 | 0,670500 | 1,2410 | 21,3300 | 6,3510 | 4,7630 | 20,250000 | 22,4800 |
| <b>RGD4C/AAVP<br/>Grp78-HSVtk</b>      | 6,8780                                   | 3,6040 | 2,8230 | 0,729400 | 1,8610 | 6,7690  | 8,6780 | 6,6900 | 28,780000 | 28,7800 |
| <b>TMZ</b>                             | 0,4734                                   | 0,2085 | 0,8918 | 0,408500 | 0,7929 | 7,3300  | 1,9860 | 1,1360 | 3,884000  | 5,5140  |
| <b>RGD4C/AAVP<br/>Grp78-HSVtk +TMZ</b> | 3,2800                                   | 6,3510 | 4,3330 | 0,652000 | 0,5072 | 0,7777  | 2,2350 | 0,7837 | 1,859000  | 2,1840  |

**C**

|                                        | Days post intracranial cell implantation |      |      |      |      |          |          |          |          |          |
|----------------------------------------|------------------------------------------|------|------|------|------|----------|----------|----------|----------|----------|
|                                        | 9                                        |      |      |      |      | 27       |          |          |          |          |
|                                        |                                          |      |      |      |      |          |          |          |          |          |
| <b>non-targeted</b>                    | 100,                                     | 100, | 100, | 100, | 100, | 1252,569 | 372,952  | 279,6993 | 1189,148 | 1320,101 |
| <b>RGD4C/AAVP<br/>Grp78-HSVtk</b>      | 100,                                     | 100, | 100, | 100, | 100, | 212,9232 | 272,972  | 210,4382 | 905,2933 | 905,2933 |
| <b>TMZ</b>                             | 100,                                     | 100, | 100, | 100, | 100, | 1320,673 | 357,825  | 204,6773 | 699,7946 | 993,4777 |
| <b>RGD4C/AAVP<br/>Grp78-HSVtk +TMZ</b> | 100,                                     | 100, | 100, | 100, | 100, | 25,71215 | 73,89309 | 25,91052 | 61,46186 | 72,20694 |

**Figure 4- Therapeutic response of orthotopic U87 glioblastoma to combination of TMZ with RGD4C/AAVP-Grp78-HSVtk plus GCV**
