# Supplementary material for: Efficacy of systemic temozolomide‐activated phage‐targeted gene therapy in human glioblastoma
Source: PubMed Central journal article supplement (PMC6460351; doi:10.15252/emmm.201708492), 2019-02-27
Supplement: EMMM-11-e8492-s006.pdf [file EMMM-11-e8492-s006.pdf]

C

HSJD-GBM-001

| Day | Non-targeted/AAVP-Luc |      |      | RGD4C/AAVP-Luc |        |        |
|-----|-----------------------|------|------|----------------|--------|--------|
|     |                       |      |      |                |        |        |
| 2   | 293                   | 273  | 266  | 3570           | 5230   | 773    |
| 3   | 280                   | 306  | 296  | 21700          | 20400  | 10900  |
| 4   | 343                   | 336  | 326  | 151000         | 115000 | 128000 |
| 5   | 640                   | 443  | 716  | 149000         | 174000 | 209000 |
| 6   | 1410                  | 1140 | 950  | 377000         | 444000 | 276000 |
| 7   | 2080                  | 953  | 1180 | 551000         | 322000 | 664000 |
| 8   | 3330                  | 1740 | 1200 | 565000         | 622000 | 520000 |

G26

| Day | Non-targeted/AAVP-Luc |     |     |     |      |     |     |     |
|-----|-----------------------|-----|-----|-----|------|-----|-----|-----|
|     |                       |     |     |     |      |     |     |     |
| 2   | 490                   | 520 | 486 | 556 | 556  | 450 | 410 | 516 |
| 3   | 586                   | 530 | 623 | 576 | 636  | 610 | 470 | 610 |
| 4   | 553                   | 500 | 500 | 436 | 760  | 526 | 450 | 596 |
| 5   | 380                   | 420 | 426 | 436 | 506  | 473 | 416 | 340 |
| 6   | 446                   | 490 | 433 | 443 | 373  | 436 | 410 | 380 |
| 7   | 396                   | 353 | 360 | 416 | 460  | 360 | 320 | 296 |
| 8   | 443                   | 396 | 366 | 300 | 5050 | 516 | 340 | 403 |

| Day | RGD4C/AAVP-Luc |       |       |       |       |       |       |        |
|-----|----------------|-------|-------|-------|-------|-------|-------|--------|
|     |                |       |       |       |       |       |       |        |
| 2   | 580            | 1160  | 2650  | 1210  | 1260  | 623   | 656   | 766    |
| 3   | 2780           | 3560  | 6380  | 2030  | 8650  | 9800  | 7600  | 3860   |
| 4   | 5520           | 6880  | 9320  | 3000  | 8100  | 8570  | 6700  | 7480   |
| 5   | 16400          | 18100 | 19700 | 8270  | 19800 | 16100 | 10800 | 20900  |
| 6   | 28700          | 21900 | 44100 | 24400 | 22200 | 21100 | 22400 | 31100  |
| 7   | 49200          | 33900 | 55800 | 35100 | 28100 | 32500 | 39700 | 59500  |
| 8   | 69900          | 45800 | 82100 | 53500 | 53500 | 61300 | 68400 | 143000 |

Figure 6- Characterization of the human primary GBM, then analysis of targeted gene delivery
