# Supplementary material for: Efficacy of systemic temozolomide‐activated phage‐targeted gene therapy in human glioblastoma
Source: PubMed Central journal article supplement (PMC6460351; doi:10.15252/emmm.201708492), 2019-02-27
Supplement: EMMM-11-e8492-s007.pdf [file EMMM-11-e8492-s007.pdf]

**B****Astrocytes**

| Day      | Non-targeted/AAVP-Luc |     |     |     | RGD4C/AAVP-Luc |     |     |     |
|----------|-----------------------|-----|-----|-----|----------------|-----|-----|-----|
|          |                       |     |     |     |                |     |     |     |
| <b>2</b> | 223                   | 236 | 186 | 223 | 220            | 263 | 236 | 210 |
| <b>3</b> | 250                   | 223 | 316 | 273 | 210            | 290 | 256 | 253 |
| <b>4</b> | 293                   | 350 | 333 | 326 | 383            | 396 | 416 | 373 |
| <b>5</b> | 466                   | 300 | 250 | 276 | 253            | 246 | 263 | 260 |
| <b>6</b> | 218                   | 204 | 217 | 231 | 184            | 210 | 211 | 177 |
| <b>7</b> | 383                   | 310 | 290 | 273 | 330            | 270 | 293 | 313 |
| <b>8</b> | 356                   | 266 | 226 | 250 | 193            | 233 | 226 | 233 |

| TMZ  | RGD4C/AAVP-Luc |     |     |     |
|------|----------------|-----|-----|-----|
| 0.   | 193            | 233 | 226 | 233 |
| 35.  | 193            | 230 | 253 | 180 |
| 70.  | 220            | 220 | 220 | 236 |
| 100. | 173            | 226 | 266 | 246 |
| 150. | 190            | 190 | 180 | 223 |

**Skin**

| Day      | Non-targeted/AAVP-Luc |     |     |     | RGD4C/AAVP-Luc |     |     |     |
|----------|-----------------------|-----|-----|-----|----------------|-----|-----|-----|
|          |                       |     |     |     |                |     |     |     |
| <b>2</b> | 236                   | 336 | 350 | 336 | 296            | 283 | 306 | 320 |
| <b>3</b> | 333                   | 323 | 363 | 346 | 336            | 356 | 443 | 400 |
| <b>4</b> | 410                   | 296 | 380 | 273 | 426            | 280 | 303 | 293 |
| <b>5</b> | 346                   | 366 | 413 | 436 | 363            | 410 | 416 | 436 |
| <b>6</b> | 593                   | 606 | 503 | 516 | 460            | 400 | 440 | 450 |
| <b>7</b> | 490                   | 520 | 516 | 446 | 556            | 566 | 520 | 523 |
| <b>8</b> | 373                   | 380 | 370 | 403 | 386            | 403 | 373 | 400 |

| TMZ  | RGD4C/AAVP-Luc |     |     |     |
|------|----------------|-----|-----|-----|
| 0.   | 386            | 403 | 373 | 400 |
| 35.  | 360            | 410 | 383 | 373 |
| 70.  | 366            | 453 | 446 | 476 |
| 100. | 336            | 356 | 393 | 330 |
| 150. | 323            | 363 | 380 | 373 |

## Lung

| Day | Non-targeted/AAVP- <i>Luc</i> |     |     |     | RGD4C/AAVP- <i>Luc</i> |     |     |     |
|-----|-------------------------------|-----|-----|-----|------------------------|-----|-----|-----|
|     |                               |     |     |     |                        |     |     |     |
| 2   | 506                           | 413 | 423 | 476 | 410                    | 460 | 396 | 463 |
| 3   | 350                           | 396 | 360 | 370 | 403                    | 296 | 320 | 336 |
| 4   | 350                           | 356 | 360 | 380 | 360                    | 326 | 343 | 406 |
| 5   | 283                           | 220 | 253 | 283 | 216                    | 240 | 216 | 310 |
| 6   | 356                           | 326 | 310 | 426 | 283                    | 286 | 246 | 323 |
| 7   | 340                           | 340 | 353 | 373 | 283                    | 386 | 380 | 356 |
| 8   | 423                           | 346 | 356 | 316 | 406                    | 346 | 346 | 320 |

| TMZ  | RGD4C/AAVP- <i>Luc</i> |     |     |     |
|------|------------------------|-----|-----|-----|
| 0.   | 406                    | 346 | 346 | 320 |
| 35.  | 406                    | 336 | 353 | 316 |
| 70.  | 380                    | 336 | 340 | 356 |
| 100. | 410                    | 290 | 306 | 306 |
| 150. | 436                    | 400 | 373 | 370 |

**Figure 7- Integrin expression in human primary normal cells, then analysis of targeted gene delivery.**
