# Supplementary material for: Efficacy of systemic temozolomide‐activated phage‐targeted gene therapy in human glioblastoma
Source: PubMed Central journal article supplement (PMC6460351; doi:10.15252/emmm.201708492), 2019-02-27
Supplement: EMMM-11-e8492-s008.pdf [file EMMM-11-e8492-s008.pdf]

C

|                                               | Days post intracranial cell implantation |      |      |      |      |          |          |          |          |          |
|-----------------------------------------------|------------------------------------------|------|------|------|------|----------|----------|----------|----------|----------|
|                                               | 10                                       |      |      |      |      | 34       |          |          |          |          |
| non-targeted                                  | 100,                                     | 100, | 100, | 100, | 100, | 45.36823 | 29.44786 | 1074.673 | 1124.075 | 43.61217 |
| <b>RGD4C/AAVP<br/><i>Grp78-HSVtk</i></b>      | 100,                                     | 100, | 100, | 100, | 100, | 180.6431 | 54.78537 | 140.1765 | 42.87887 | 125.4718 |
| <b>TMZ</b>                                    | 100,                                     | 100, | 100, | 100, | 100, | 293.3208 | 15.71775 | 2.491297 | 576.4139 | 2.668833 |
| <b>RGD4C/AAVP<br/><i>Grp78-HSVtk</i> +TMZ</b> | 100,                                     | 100, | 100, | 100, | 100, | 3.238107 | 44.48055 | 2.91391  | 13.31329 | 2.444983 |

E

|                                               | Days post intracranial cell implantation |      |      |      |      |      |      |      |      |      |      |      |
|-----------------------------------------------|------------------------------------------|------|------|------|------|------|------|------|------|------|------|------|
|                                               | 10                                       |      |      |      |      |      | 34   |      |      |      |      |      |
| non-targeted                                  | 17.9                                     | 18.8 | 18.3 | 17.7 | 19.6 | 20.6 | 15.8 | 20.3 |      | 16.5 |      | 22.6 |
| <b>RGD4C/AAVP<br/><i>Grp78-HSVtk</i></b>      | 19.3                                     | 18.1 | 18.1 | 17.4 | 19.4 | 18.9 |      | 19.8 | 18.5 | 18.3 | 20.9 | 16.3 |
| <b>TMZ</b>                                    | 18.2                                     | 19.4 | 17.5 | 19.7 | 20.5 | 20.8 | 19.4 | 20.1 | 18.8 | 16.8 | 21.7 | 23.5 |
| <b>RGD4C/AAVP<br/><i>Grp78-HSVtk</i> +TMZ</b> | 18.7                                     | 19.1 | 19.1 | 19.8 | 17.6 | 20.8 | 20.9 | 21.3 | 20.2 | 20.9 | 18.2 | 20.5 |

**Figure 9- RGD4C/AAVP-*Grp78-HSVtk* plus GCV gene therapy and combination with TMZ against orthotopic murine GL261 GBM**
